# Supplementary material for: Utilizing Tb3+ as an energy transfer bridge to connect Eu2+–Sm3+ luminescent centers: realization of efficient Sm3+ red emission under near-UV excitation
Source: Royal Society of Chemistry journal article supplement (doi:10.1039/c3cc39277e), 2013-01-01
Supplement: c3cc39277e.pdf [file c3cc39277e.pdf]

## **Supporting information**

**Utilizing the Tb<sup>3+</sup> as energy transfer bridge to connect the Eu<sup>2+</sup>-Sm<sup>3+</sup> luminescent centers: Realization the Efficient Sm<sup>3+</sup> Ion Red Emission under near-UV Excited**

Yongchao Jia,<sup>a,b</sup> Wei Lü,<sup>a</sup> Ning Guo,<sup>a,b</sup> Wenzhen Lü,<sup>a,b</sup> Qi Zhao,<sup>a,b</sup> Hongpeng You<sup>a,\*</sup>

*<sup>a</sup>State key Laboratory of Rare Earth Resource Utilization, Changchun Institute of Applied Chemistry, Chinese Academy of Sciences, Changchun 130022, P. R. China.*

*<sup>b</sup>Graduate University of the Chinese Academy of Sciences, Beijing 100049, P. R. China.*

## Experimental Section

SrCO<sub>3</sub> (Analytical Reagent, A. R.), Y<sub>2</sub>O<sub>3</sub> (99.99%), Eu<sub>2</sub>O<sub>3</sub> (99.99%), Tb<sub>4</sub>O<sub>7</sub> (99.99%), Sm<sub>2</sub>O<sub>3</sub> (99.99%), NH<sub>4</sub>H<sub>2</sub>PO<sub>4</sub> (Analytical Reagent, A. R.), were used as the raw materials.

The phosphors with the compositions:

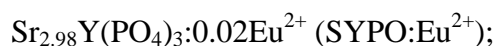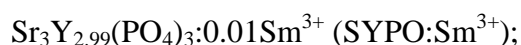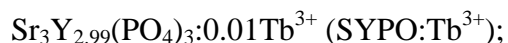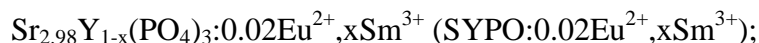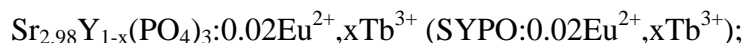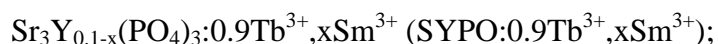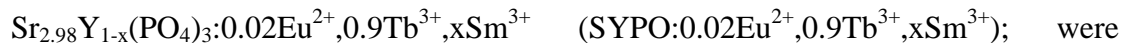

prepared using high temperature solid-state reaction method. The stoichiometric amount of raw materials was thoroughly mixed by grinding in an agate mortar. The power mixtures were then transferred into crucibles and heated at 1300°C for 4 h in crucibles alone with the air. After that, the sample was reground in a mortar followed by sintering under a reductive atmosphere at 1200°C for 2 h in a 10% H<sub>2</sub>-90% N<sub>2</sub> gas mixture. Finally, the obtained samples were cooled to room temperature and ground again in an agate mortar.

## Characterization

Powder XRD data were obtained using Cu-K radiation (Bruker D8) over the angular range  $10^\circ \leq 2\theta \leq 80^\circ$  with a step size  $0.02^\circ$ . Room temperature photoluminescence (PL) spectra

were measured on Hitachi F-4500 luminescence spectrophotometer scanning the wavelength range of 300-700nm. The diffuse-reflectance spectra were obtained by a SHIMADZU UV-3600 UV-vis-NiR spectrophotometer with the reflection of black felt (reflection 3%) and white BaSO<sub>4</sub> (reflection100%) in the wavelength region of 200–600 nm. The luminescence decay curve was obtained from a Lecroy Wave Runner 6100 Digital Oscilloscope (1GHz) using a tunable laser (puls width = 4ns, gate = 50ns) as the excitation source (Continum Sunlite OPO). All the measurements mentioned above were performed at room temperature.

## Results and Discussion

### 1. Analysis of the sensitization effect of the $\text{Eu}^{2+}$ - $\text{Tb}^{3+}$ , $\text{Tb}^{3+}$ - $\text{Sm}^{3+}$ luminescent centers

Figure S5 shows the emission spectra of  $\text{SrYPO}:0.02\text{Eu}^{2+},x\text{Tb}^{3+}$  under 365 nm excitation. With increasing  $\text{Tb}^{3+}$  content, the intensity of green emission lines increase systematically. Meanwhile, a remarkable drop of  $\text{Eu}^{2+}$  emission band is seen from  $x = 0.1$  to 0.9. Figure S6 depicted the PL decay curves of  $\text{Eu}^{2+}$  ions in  $\text{SrYPO}:0.02\text{Eu}^{2+},x\text{Tb}^{3+}$ , which were measured with an excitation at 355 nm and monitored at 520 nm. The decay curve for singly  $\text{Eu}^{2+}$ -doped SrYPO host can be fitted into a second-exponential function. The incorporation of  $\text{Tb}^{3+}$  ions can significantly modifies the fluorescent dynamics of the  $\text{Eu}^{2+}$  ions. When  $\text{Tb}^{3+}$  ions were introduced, the fluorescence decays of  $\text{Eu}^{2+}$  ions deviate slightly from a second-exponential rule. This deviation is more evident with the increase in the content of  $\text{Tb}^{3+}$  ions. Above facts provide the solid evidence for sensitization effect between the  $\text{Eu}^{2+}$ - $\text{Tb}^{3+}$  luminescent centers.

Figure S7 shows the emission spectra of  $\text{SrYPO}:0.9\text{Tb}^{3+},x\text{Sm}^{3+}$  under 381 nm excitation. With increasing  $\text{Sm}^{3+}$  content, the intensity of red emission lines reaches a maximum as  $x$  equals about 0.02 and then begins to decrease due to concentration quenching. Meanwhile, a remarkable drop of  $\text{Tb}^{3+}$  emission lines is seen from  $x = 0.01$  to 0.07. Figure S8 depicted the PL decay curves of  $\text{Tb}^{3+}$  ions in  $\text{SrYPO}:0.9\text{Tb}^{3+},x\text{Sm}^{3+}$ , which were measured with an excitation at 355 nm and monitored at 542 nm. The decay curve for singly  $\text{Tb}^{3+}$ -doped SrYPO host can be fitted into a single-exponential function. The incorporation of  $\text{Sm}^{3+}$  ions can significantly modifies the fluorescent dynamics of the  $\text{Tb}^{3+}$  ions. When  $\text{Sm}^{3+}$  ions were introduced, the fluorescence decays of  $\text{Tb}^{3+}$  ions deviate slightly from a single-exponential rule. This deviation is more evident with the increase in the content of  $\text{Sm}^{3+}$  ions. Above facts provide the solid

evidence for sensitization effect between the  $\text{Tb}^{3+}$ - $\text{Sm}^{3+}$  luminescent centers.

## 2. Phase formation

Figure S10 shows the XRD patterns of the typical obtained powders, together with the standard data for  $\text{SLnPO}$  ( $\text{Ln} = \text{Y}, \text{Tb}$ ). All the diffraction peaks of obtained samples can be indexed to the corresponding standard data, indicating that obtained samples are single phase and doped  $\text{Eu}^{2+}/\text{Sm}^{3+}$  ions have been incorporated in the host lattice by replace  $\text{Sr}^{2+}/\text{Ln}^{3+}$  crystallographic sites.

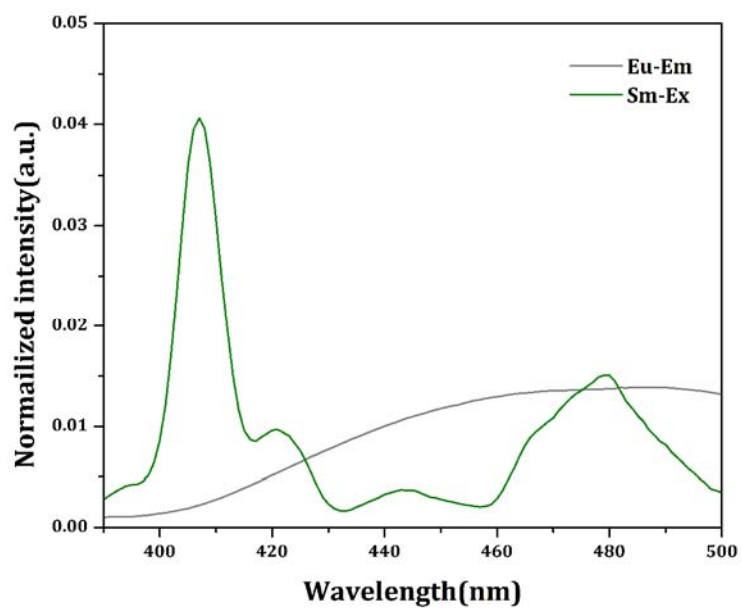

**Figure S1.** The overlap spectra between the PLE-SYPO:0.02Sm<sup>3+</sup> and PL-SYPO:0.02Eu<sup>2+</sup> samples.

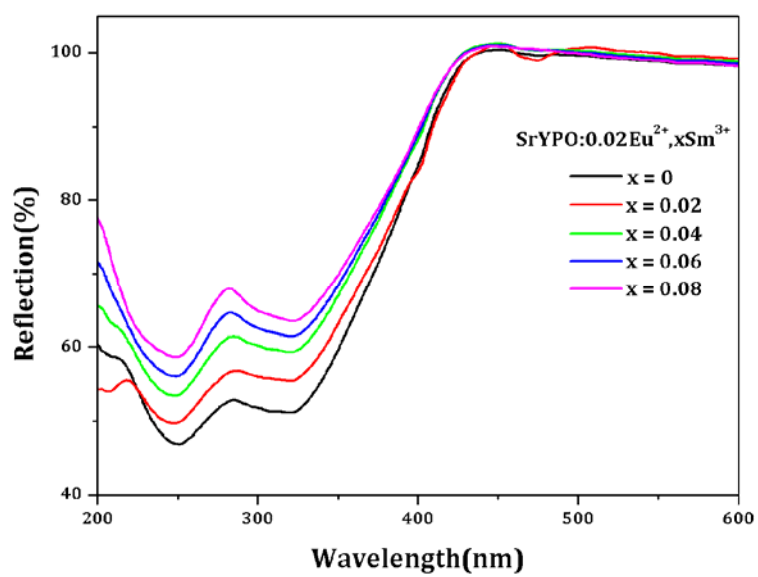

**Figure S2.** Diffuse reflection spectra of SrYPO:0.02Eu<sup>2+</sup>, xSm<sup>3+</sup> samples (x = 0, 0.02, 0.04, 0.06, 0.08).

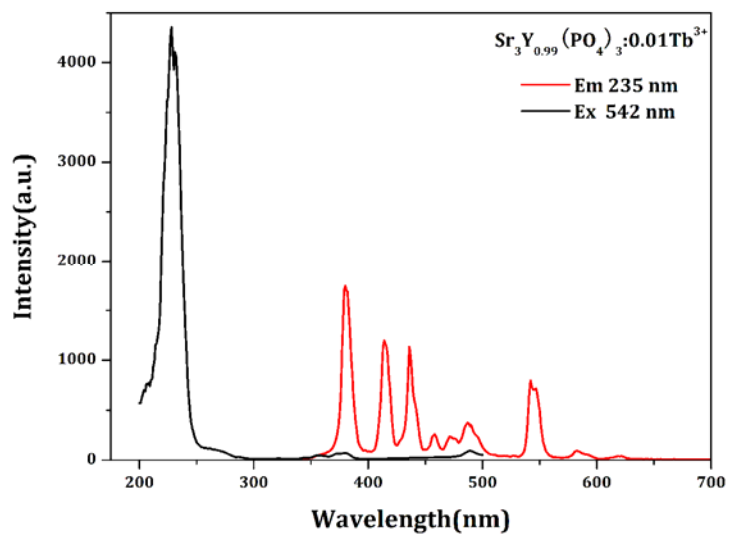

**Figure S3.** The PL and PLE of the  $\text{SYPO}:0.01\text{Tb}^{3+}$  sample.



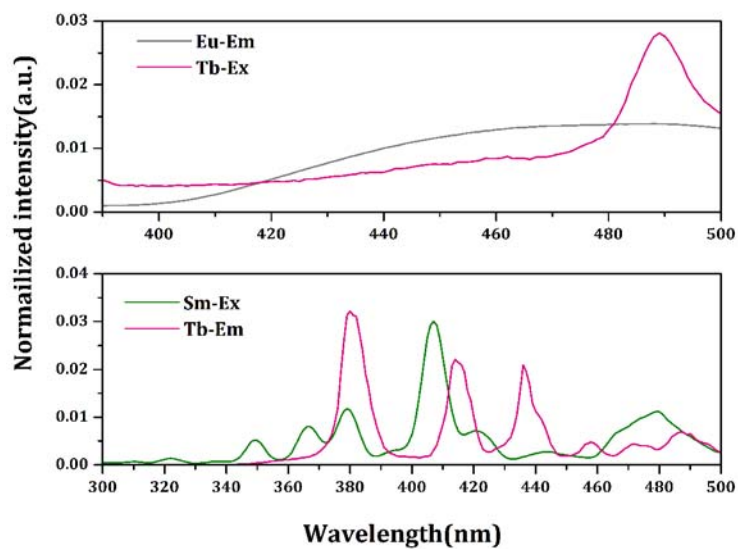

**Figure S4.** The overlap spectra between the PLE-SYPO:0.01Tb<sup>3+</sup> and PL-SYPO:0.02Eu<sup>2+</sup> samples; the PLE-SYPO:0.02Sm<sup>3+</sup> and PL-SYPO:0.01Tb<sup>3+</sup> samples.

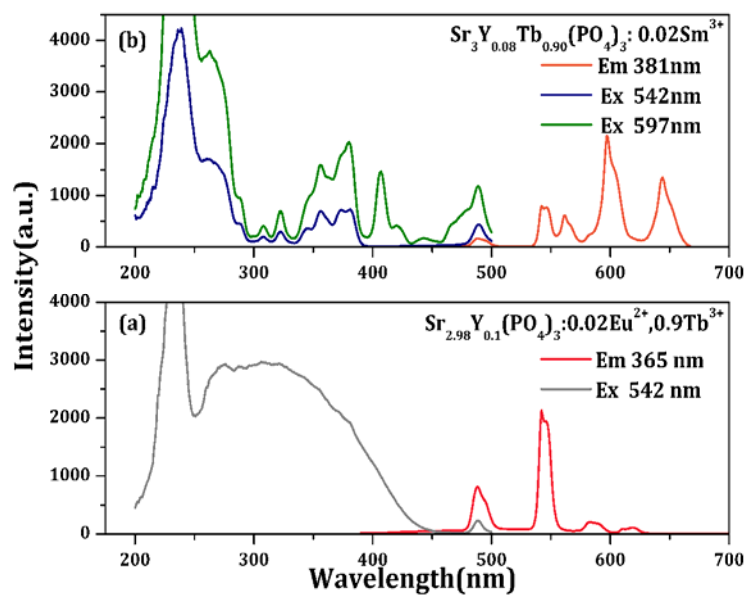

**Figure S5.** The PL and PLE of the  $\text{Eu}^{2+}/\text{Tb}^{3+}$  codoped SYPO sample (a); the  $\text{Tb}^{3+}/\text{Sm}^{3+}$  codoped SYPO sample (b).

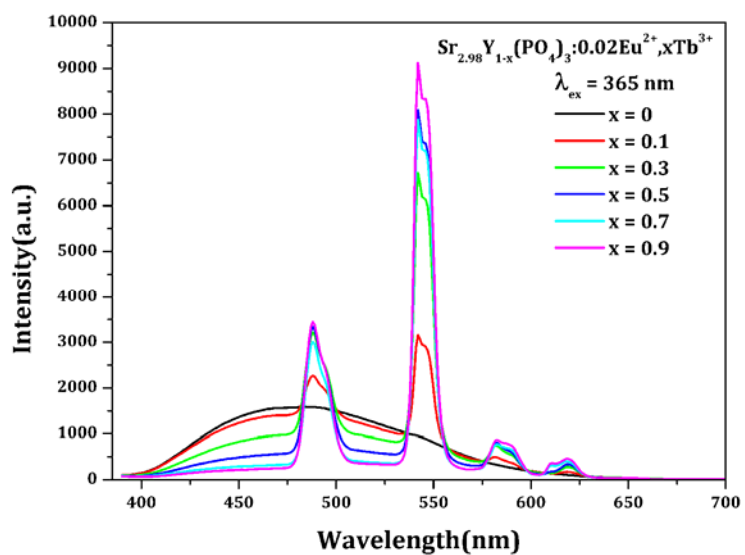

**Figure S6.** The PL spectra of  $\text{SYPO}:0.02\text{Eu}^{2+},x\text{Tb}^{3+}$  ( $x = 0, 0.1, 0.3, 0.5, 0.7, 0.9$ ) samples under the 365 nm excitation.

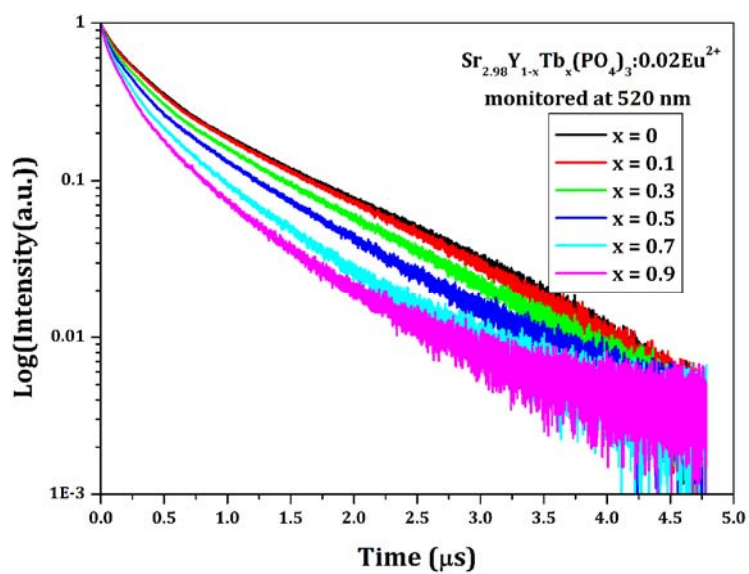

**Figure S7.** Decay curves of Eu<sup>2+</sup> ions in SYPO:0.02Eu<sup>2+</sup>,xTb<sup>3+</sup> (x = 0, 0.1, 0.3, 0.5, 0.7, 0.9) samples (excited at 355 nm, monitored at 520 nm).

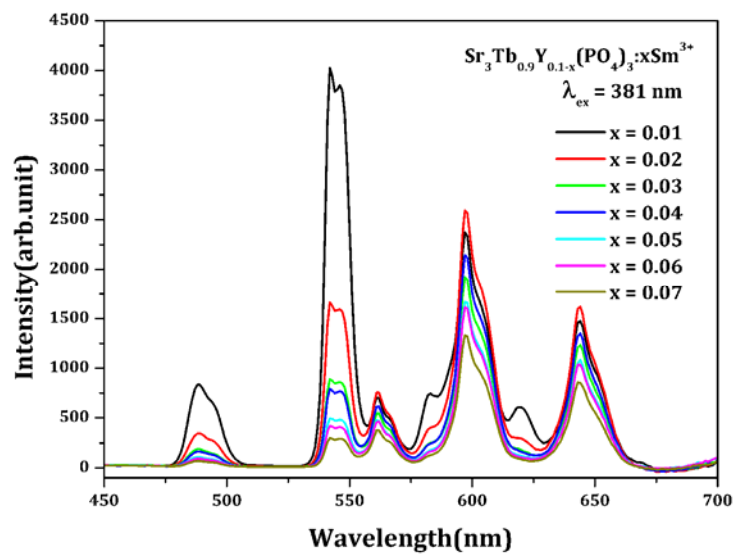

**Figure S8.** The PL spectra of  $\text{SYPO}:0.9\text{Tb}^{3+},x\text{Sm}^{3+}$  ( $x = 0, 0.01, 0.02, 0.03, 0.04, 0.05, 0.06, 0.07,$ ) samples under the 381 nm excitation.

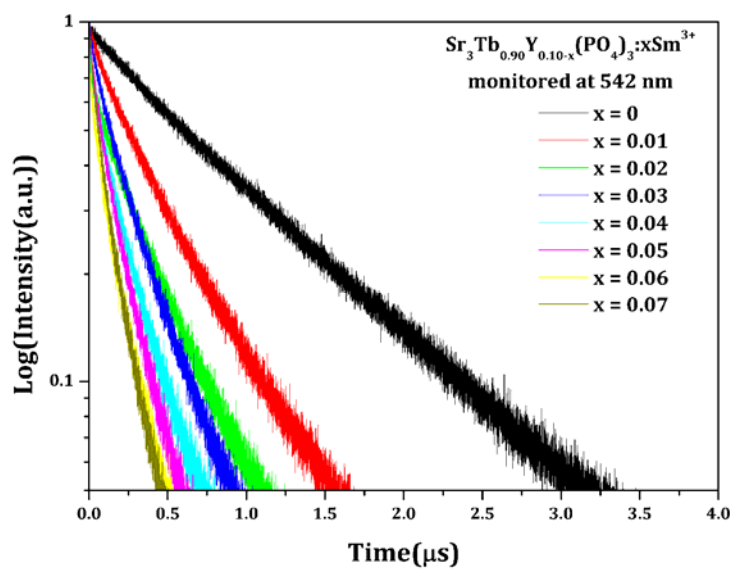

**Figure S9.** Decay curves of Tb<sup>3+</sup> ions in SYPO:0.9Tb<sup>3+</sup>,xSm<sup>3+</sup> (x = 0, 0.01, 0.02, 0.03, 0.04, 0.05, 0.06, 0.07,) samples (excited at 355 nm, monitored at 542 nm).

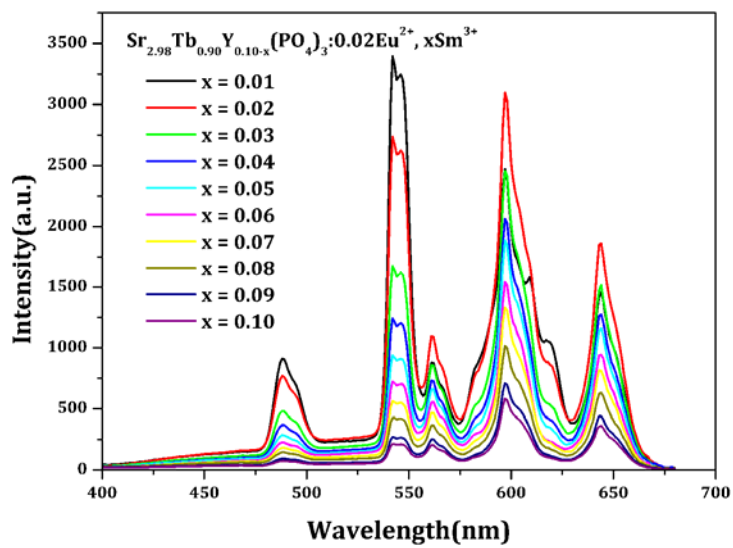

**Figure S10.** The PL spectra of SYPO:0.02Eu<sup>2+</sup>,0.9Tb<sup>3+</sup>,xSm<sup>3+</sup> (x = 0, 0.01, 0.02, 0.03, 0.04, 0.05, 0.06, 0.07,) samples under the 390 nm excitation.

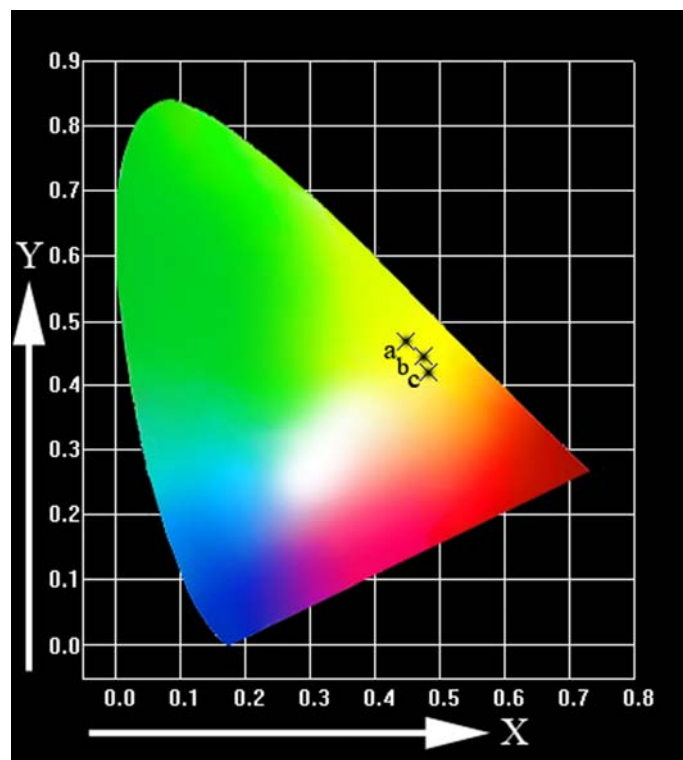

**Figure S11.** CIE chromaticity diagram for SYPO:0.02Eu<sup>2+</sup>,0.9Tb<sup>3+</sup>,xSm<sup>3+</sup> excited at 390 nm: (a) x = 0.01; (b) x = 0.05; (c) x = 0.10.



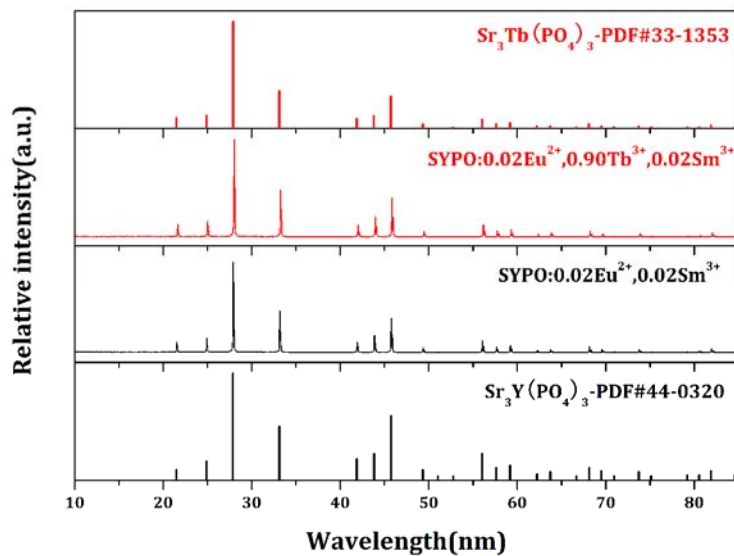

**Figure S12.** XRD profiles for the typical powders  $\text{SYPO:0.02Eu}^{2+}, 0.02\text{Sm}^{3+}$  and  $\text{SrYPO:0.02Eu}^{2+}, 0.90\text{Tb}^{3+}, 0.02\text{Sm}^{3+}$ . The standard data for  $\text{Sr}_3\text{Y}(\text{PO}_4)_3$  (JCPDS card No. 44-0320) and  $\text{Sr}_3\text{Tb}(\text{PO}_4)_3$  (JCPDS card No. 33-1535) is shown as reference.
